# Supplementary material for: Attitudes toward medical cannabis among family physicians practising in Ontario, Canada: a qualitative research study
Source: PubMed Central journal article supplement — CMAJ Open. 2021 Apr 13;9(2):E342–8. doi: 10.9778/cmajo.20200187 (PMC8084545; doi:10.9778/cmajo.20200187), 2021-04-13
Supplement: supp_9.2.E342_2020-0187-1-at.pdf [file supp_9.2.E342_2020-0187-1-at.pdf]

## Appendix 1: Interview Guide

1. Do you have any patients that currently use medical cannabis?
2. What conditions (if any) do you perceive medical cannabis may have role in management?
3. Do you feel that patients who use cannabis experience specific beneficial effects?
4. Are you concerned about harms associated with medical cannabis use?
5. Do you feel that some patients may access medical cannabis for recreational purposes?
6. Should the legalization of recreational cannabis affect use of medicinal cannabis?
7. Do you authorize medical cannabis for patients? Why or why not?
8. What are your impressions about the evidence underlying medical cannabis?
9. What are your thoughts on the Canadian Medical Association's stated position to move away from medical cannabis once recreational use is legal?
10. What is your knowledge regarding medical cannabis?
11. What are your impressions about the current regulation of medical cannabis?
12. What education regarding medical cannabis, if any, would you like to receive?
13. Where do you feel future research regarding medical cannabis should be directed?
14. Are there any final thoughts you would like to add regarding the administration and use of medical cannabis?
