# Supplementary material for: Attitudes toward medical cannabis among family physicians practising in Ontario, Canada: a qualitative research study
Source: PubMed Central journal article supplement — CMAJ Open. 2021 Apr 13;9(2):E342–8. doi: 10.9778/cmajo.20200187 (PMC8084545; doi:10.9778/cmajo.20200187), 2021-04-13
Supplement: supp_9.2.E342_2020-0187-2-at.pdf [file supp_9.2.E342_2020-0187-2-at.pdf]

## Appendix 2: Summary of McGrath et al. (2019)'s Twelve Tips for Conducting Qualitative Research Interviews

|        |                                                                   |
|--------|-------------------------------------------------------------------|
| Tip 1  | Identify when qualitative research interviews are appropriate     |
| Tip 2  | Prepare yourself as an interviewer                                |
| Tip 3  | Construct an interview guide and test your questions              |
| Tip 4  | Consider cultural and power dimensions of the interview situation |
| Tip 5  | Build rapport with your respondents                               |
| Tip 6  | Remember you are a co-creator of the data                         |
| Tip 7  | Talk less and listen more                                         |
| Tip 8  | Allow yourself to adjust the interview guide                      |
| Tip 9  | Be prepared to handle unanticipated emotions                      |
| Tip 10 | Transcribe the interviews in good time                            |
| Tip 11 | Check the data                                                    |
| Tip 12 | Initiate analysis early                                           |

For further reading, please consult the full-text article as follows:

McGrath C, Palmgren PJ, Liljedahl M. Twelve tips for conducting qualitative research interviews. *Medical teacher*. 2019 Sep 2;41(9):1002-6. <https://doi.org/10.1080/0142159X.2018.1497149>.
